# Supplementary material for: Introducing the MISR Level 2 Near Real-Time Aerosol Product
Source: Copernicus journal article supplement (doi:10.5194/amt-2021-71), 2021-03-24

## Introducing the MISR Level 2 Near Real-Time Aerosol Product

Marcin. L. Witek<sup>1</sup>, Michael J. Garay<sup>1</sup>, David J. Diner<sup>1</sup>, Michael A. Bull<sup>1</sup>, Felix C. Seidel<sup>1</sup>, Abigail M. Nastan<sup>1</sup>, and Earl G. Hansen<sup>1</sup>

<sup>1</sup>Jet Propulsion Laboratory, California Institute of Technology, 4800 Oak Grove Drive, Pasadena, CA 91109, USA

### Abstract

Atmospheric aerosols are an important element of Earth's climate system, and have significant impacts on the environment and on human health. Global aerosol modeling has been increasingly used for operational forecasting and as support to decision making. For example, aerosol analyses and forecasts are routinely used to provide air quality information and alerts in both civilian and military applications. The growing demand for operational aerosol forecasting calls for additional observational data that can be assimilated into models to improve model accuracy and predictive skill. These factors have motivated the development, testing, and release of a new near real-time (NRT) level 2 (L2) aerosol product from the Multi-angle Imaging SpectroRadiometer (MISR) instrument on NASA's Terra platform. The NRT product capitalizes on the unique attributes of the MISR aerosol retrieval approach and product contents, such as reliable aerosol optical depth as well as aerosol microphysical information. Several modifications are described that allow for rapid product generation within a three-hour window following acquisition of the satellite observations. Implications for the product quality and consistency are discussed as compared to the current operational L2 MISR aerosol product. Several ways of implementing additional use-specific retrieval screenings are also highlighted.

© 2021. California Institute of Technology. Government sponsorship acknowledged

## 1. Introduction

Atmospheric aerosols have for long been recognized to influence the climate, environment, and human health (e.g., IPCC, 2013; Lelieveld et al., 2015; Shindell et al., 2013; Turnock et al., 2020). They also affect satellite remote sensing of important geophysical parameters such as ocean color (e.g., Frouin et al., 2019; Gordon, 1997) or greenhouse gas abundance (Butz et al., 2009; Frankenberg et al., 2012; Houweling et al., 2005). Aerosol particles and their properties have been extensively studied in-situ and remotely: from the ground, in the air, and from space. These observational data vary in spatial and temporal coverage, but usually only offer snapshots of local conditions. Since atmospheric aerosols have a life cycle ranging from hours to days, numerical modeling of their emission, transport, and deposition has filled the coverage gaps and extended our understanding of their global impacts. This has given rise to a number of global aerosol reanalyses (Gelaro et al., 2017; Inness et al., 2013, 2019; Lynch et al., 2016; Rienecker et al., 2011) that provide a long-range, gridded, and internally consistent outlook on aerosol burdens around the world. Furthermore, global aerosol modeling has been increasingly used for operational forecasting (e.g., Xian et al., 2019) and as support to decision making, for example in air quality alerts and in non-civilian applications (Liu et al., 2007).

The growing demand for consistent gridded aerosol products has been driving development and steady improvement of numerical predictions. Still, models suffer from often poorly resolved aerosol emissions and sinks and can be affected by errors in the underlying meteorology. As a result, systematic and sampling-related biases in aerosol fields are often found between model simulations and satellite observations (e.g., Buchard et al., 2015; Colarco et al., 2010; Lamarque et al., 2013; Zhang and Reid, 2009). An effective way to mitigate some of these problems is by assimilating aerosol observations into numerical models (e.g., Bocquet et al., 2015; Fu et al., 2017; Sekiyama et al., 2010; Di Tomaso et al., 2017; Werner et al., 2019; Zhang et al., 2008). Satellite observations of aerosol optical and microphysical properties are inseparable from these data assimilation activities as they offer the necessary data volume, near-global coverage, and frequent repeat cycle. However, an often-considerable latency for generating science-quality "standard" satellite products (8 to 40 hours) renders them unsuitable for operational forecasting. This has led to the development of aerosol products within the time frame required by modeling centers, usually three hours from satellite overpass. A range of near real-time (NRT) products has emerged.

One example of a platform that provides users with NRT satellite products and imagery is NASA's Land, Atmosphere Near real-time Capability for EOS (LANCE) project

63 (<https://earthdata.nasa.gov/earth-observation-data/near-real-time>). A range of instruments  
64 deliver various Level 1 (L1) and Level 2 (L2) data products  
65 ([https://earthdata.nasa.gov/collaborate/open-data-services-and-software/data-information-](https://earthdata.nasa.gov/collaborate/open-data-services-and-software/data-information-policy/data-levels)  
66 [policy/data-levels](https://earthdata.nasa.gov/collaborate/open-data-services-and-software/data-information-policy/data-levels)), including radiances, land surface properties, and atmospheric  
67 thermodynamics and composition within three hours from satellite observation. NRT aerosol  
68 products are currently available from the Moderate Resolution Imaging Spectroradiometer  
69 (MODIS), Ozone Monitoring Instrument (OMI), and Visible Infrared Imaging Radiometer Suite  
70 (VIIRS). NASA's Multi-angle Imaging SpectroRadiometer (MISR) currently provides NRT  
71 radiance and cloud motion vector products. The purpose of this paper is to introduce a new  
72 MISR NRT L2 aerosol product.

73 This paper is organized as follows. Section 2 and 3 provide brief descriptions of the  
74 MISR instrument and the data processing sequence, respectively. Section 4 first outlines the  
75 cloud identification methods employed in the MISR aerosol algorithm and then describes  
76 algorithmic modifications introduced in the NRT processing. Adjustments to cloud and retrieval  
77 screening parameters and their implications are discussed. The global distributions of the NRT  
78 product are analyzed in Section 5. Section 6 provides a summary.

79

## 80 **2. MISR instrument and aerosol data product**

81

82 The MISR instrument flies aboard the NASA Earth Observing System (EOS) Terra satellite,  
83 launched in December 1999 to a sun-synchronous descending polar orbit, at an orbital altitude  
84 of 705 km, an orbital period of 99 minutes, and an equatorial crossing time of 10:30 a.m. local  
85 time. MISR makes 14.56 orbits per day with a repetition cycle (revisit) of 16 days. The orbit  
86 tracks are georeferenced to a fixed set of 233 ground paths. With a cross-track swath of about  
87 380 km, total Earth coverage is obtained every 9 days at the equator and every 2 days at high  
88 latitudes.

89 MISR contains nine pushbroom cameras with viewing angles at the Earth's surface  
90 ranging from 0° (nadir) to +/- 70.5° oriented along the direction of the flight track. A point on the  
91 ground is imaged by all nine cameras in approximately 7 minutes. The cameras make  
92 observations of reflected solar radiance in four spectral bands, centered at 446 (blue), 558  
93 (green), 672 (red), and 866 (near-infrared) nm. The spatial resolution depends on the camera  
94 and wavelength. The red band has a full 275 m resolution in all cameras. The other three  
95 spectral channels are averaged onboard to a 1.1 km resolution in global-mode operation (Diner

et al., 1998), with the exception of the nadir camera which preserves the full 275 m resolution in all spectral channels. See <https://misr.jpl.nasa.gov/Mission/> for more details.

MISR employs two processing pathways for aerosol retrievals, one for observations over land (Martonchik et al., 2009), and another for dark water (DW) (Kalashnikova et al., 2013), which applies over deep oceans, seas, and lakes. Previous versions of the MISR aerosol product were extensively validated over the years (e.g., Kahn et al., 2010; Kahn and Gaitley, 2015; Kalashnikova et al., 2013; Shi et al., 2014; Witek et al., 2013) showing high retrieval quality over land and ocean.

The current operational version of the MISR aerosol product, designated as version 23 (V23), was released publicly in June 2018. It introduced multiple algorithmic, data product, and data usability improvements (Garay et al., 2020; Witek et al., 2018a, 2018b). V23 provides aerosol information with a spatial resolution of 4.4 km x 4.4 km packaged in NetCDF-4 format. Initial validation efforts showed that V23 retrievals are more accurate than previous versions, with most pronounced improvements in the DW algorithm (Garay et al., 2020). V23 retrievals over oceans were extensively validated by Witek et al. (2019), indicating excellent agreement with ground-based observations. Other V23 Aerosol Optical Depth (AOD) evaluation efforts show similar results (e.g., Choi et al., 2019; Sayer et al., 2020; Si et al., 2020; Sogacheva et al., 2020). A first regional insight into retrieved particle properties from the MISR V23 aerosol product shows that MISR generally captures the distinct spatial and temporal features of aerosol type in East Asia (Tao et al., 2020). Furthermore, V23 has greatly improved the quality of reported AOD uncertainties, which now realistically represent retrieval errors (Sayer et al., 2020; Witek et al., 2019). This is especially relevant as pixel-level retrieval uncertainties are very important for satellite data assimilation, which is being increasingly used in aerosol modeling studies (Lynch et al., 2016; Shi et al., 2011, 2013; Zhang and Reid, 2010). MISR data and related documentation can be obtained from: <https://asdc.larc.nasa.gov/project/MISR>.

### 3. NRT latency and data description

MISR currently provides several L1 and L2 near real-time (NRT) radiance and cloud motion vector products (<https://earthdata.nasa.gov/earth-observation-data/near-real-time/download-nrt-data/misr-nrt>). All MISR NRT processing is based on Level 0 data downlinked in observational sessions. These session-based files, representing portions of a single MISR orbit, usually cover between 10 to 50 minutes of observations, as compared to the full orbit period of 98.9 minutes.

129 This session-based processing is necessary to allow for the fast product delivery required for  
130 NRT applications.

131 The new NRT L2 aerosol product file content, described in Data Product Specification  
132 ([https://asdc.larc.nasa.gov/documents/misr/DPS\\_AEROSOL\\_NRT\\_V023.20210430.pdf](https://asdc.larc.nasa.gov/documents/misr/DPS_AEROSOL_NRT_V023.20210430.pdf)), is  
133 equivalent to the standard aerosol product (Garay et al., 2020). The NRT L2 aerosol product file  
134 name convention is:  
135 MISR\_AM1\_AS\_AEROSOL\_T{yyyymmddHHMMSS}\_P{ppp}\_O{oooooo}\_F13\_0023.nc, where  
136 'yyyy', 'mm', and 'dd' are the year, month, and day, and 'HH', 'MM' and 'SS' are the hour,  
137 minute, and seconds, respectively. Furthermore, {ppp} is the three-digit path identifier (between  
138 001 and 233) and {oooooo} is the six-digit orbit number. The NRT L2 aerosol product files are  
139 available for download within three hours of acquisition at NASA's Atmospheric Science Data  
140 Center (ASDC) (<https://asdc.larc.nasa.gov/project/MISR>).

141 For clarity, it is important to distinguish between the MISR L2 NRT, FIRSTLOOK, and  
142 standard aerosol (SA) products (see Figure 1). NRT is generated within a three-hour time  
143 interval after acquisition and uses the same ancillary inputs as FIRSTLOOK. These include the  
144 monthly gridded (1.0 degree) snow/ice mask and surface wind speed from the Terrestrial  
145 Atmospheric and Surface Climatology (TASC) database and the seasonal Radiometric Camera-  
146 by-camera Threshold Dataset (RCTD) (Diner et al., 1999a). Both NRT and FIRSTLOOK utilize  
147 TASC and RCTD datasets from the current month/season in the prior year. The FIRSTLOOK  
148 product is generated within two days from acquisition and includes cloud classification  
149 parameters obtained from the L1 and L2 cloud products. The SA product is available after final  
150 processing is performed on a seasonal basis and within three months past the end of the  
151 season, which results in a 3–6-month latency. The final processing utilizes the most recent  
152 snow/ice and wind speed data.

Deleted: (ref)

Deleted: standard aerosol

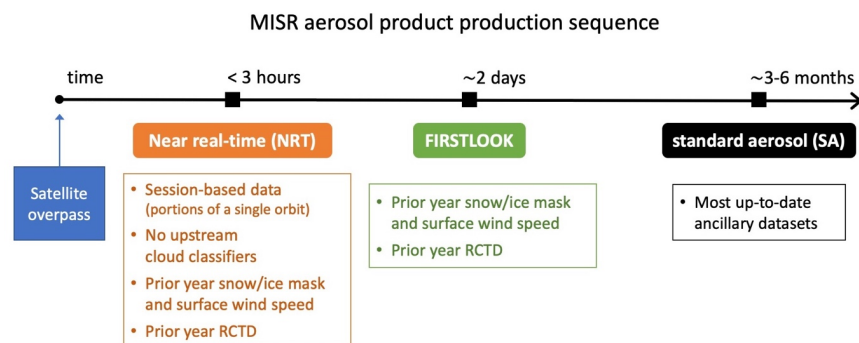

Figure 1 Schematic showing MISR aerosol product delivery timeline. Snow/ice mask and surface wind speed data are monthly averages. RCTD stands for Radiometric Camera-by-camera Threshold Dataset. MISR final production (SA) is processed on a seasonal cycle and is often delayed one to three months past the end of each season, which results in up to 6-month latency.

#### 4. NRT aerosol product cloud screening

##### 4.1. Cloud identification

Identification of cloudy pixels is a critical element of all satellite aerosol remote sensing algorithms. MISR employs several cloud identification strategies which can be loosely split into two groups: the first group relies on cloud classifiers previously generated with MISR Level 2 Cloud Detection and Classification algorithm (Diner et al., 1999b), and the second group includes build-in tests that are internal to the aerosol retrieval algorithm (Diner et al., 2008).

##### 4.1.1. Upstream cloud classifiers

The operational MISR aerosol algorithm relies on a range of external input datasets that are either static—for example, a monthly wind speed climatology—or that need to be generated prior to aerosol retrievals in upstream processing. A notable example of such external inputs to the SA and FIRSTLOOK algorithms are cloud classification parameters obtained from the MISR L2 cloud product. An important implication of this dependency is that aerosol processing needs to wait for the cloud product to be generated, creating a time lag that is prohibitive for NRT applications. Typically, the L2 cloud product is generated within about 18 hours of overpass,

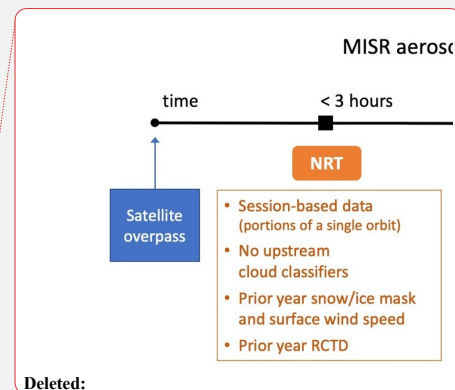

Deleted:

Deleted: standard product

Deleted: T

Deleted: standard

183 and the MISR L2 FIRSTLOOK aerosol processing is completed within about 2 days. In order to  
184 produce an L2 aerosol product within an about three-hour time frame, the algorithm needs to  
185 operate without the upstream cloud classifiers.

186 Two specific L2 cloud classification parameters utilized in aerosol processing are the  
187 MISR Stereoscopically-Derived Cloud Mask (SDCM) and the Angular Signature Cloud Mask  
188 (ASCM) (Diner et al., 1999b; Girolamo and Davies, 1994). In addition to these L2 products, the  
189 Radiometric Camera-by-camera Cloud Mask (RCCM) (Diner et al., 1999a; Girolamo and  
190 Davies, 1995) retrieved in L1B processing is also employed. All three parameters are reported  
191 at 1.1 km x 1.1 km resolution. It should be noted that RCCM also serves as an input to the  
192 algorithm that generates SDCM and ASCM, indicating that these parameters are not  
193 independent.

194 In the **FIRSTLOOK and SA** algorithm, the RCCM, SDCM, and ASCM cloud masks are  
195 used together to determine whether a particular 1.1 km x 1.1 km subregion is clear or cloudy.  
196 The implication is that if any of the 9 MISR cameras is designated as cloudy in a subregion, this  
197 subregion is excluded from aerosol retrieval. The clear/cloudy decision logic depends on the  
198 underlying surface type, assigned into three categories: land, water, and snow/ice. Generally, a  
199 “clear” outcome is favored over the two most frequently used surface types, land and water,  
200 assigning a subregion as cloudy only if the RCCM and SDCM masks indicate a cloud. The logic  
201 is considerably more conservative over snow/ice surfaces due to difficulties in distinguishing  
202 clouds from the underlying bright features. Details of the cloud mask decision logic over different  
203 surface types can be found in Diner et al. (2008).

204 Analyzing three months of V23 L2 aerosol product (March, April, May, 2020) indicates  
205 that the cloud masks along with the brightness test (see 4.1.2) lead to screening of about 50%  
206 of retrievals. As such, they have the largest impact on identifying and removing pixels where  
207 clouds might be present. These masks and decision pathways, however, have their deficiencies  
208 and additional checks were put in place to further decrease the frequency of cloud-  
209 contaminated aerosol retrievals.

210

#### 211 **4.1.2. Build-in cloud detection methods**

212

213 In addition to the cloud masks retrieved in the L1B processing (RCCM) and from the L2 Cloud  
214 Detection and Classification algorithm (SDCM, ASCM), the MISR aerosol retrieval algorithm  
215 relies on three internal tests to further identify cloudy pixels that might have escaped earlier  
216 detection. These are (1) the *brightness test*, (2) the *angle-to-angle smoothness test*, and (3) the

Deleted: standard aerosol

218 *angle-to-angle correlation test*. Details of these tests can be found in Diner et al. (2008) or Witek  
219 et al. (2013), but a short summary is provided here for completeness.

220 The brightness test is employed to identify clouds that lacked sufficient texture to be  
221 picked up by SDCM. For each surface type a fixed threshold is adopted on measured  
222 bidirectional reflectance factors (BRFs), and when exceeded in all spectral bands for at least  
223 one camera, it renders a subregion unsuitable for aerosol retrieval. The thresholds are set to  
224 1.0, 0.5, and 0.5 for snow/ice, land, and water surfaces, respectively. The value of 1.0 means  
225 that the brightness test is effectively turned off over snow/ice. Furthermore, the brightness test  
226 does not override subregions that were identified as clear by RCCM.

227 The angular smoothness test checks for unusually large variations in the measured  
228 equivalent reflectances as a function of camera angle, the premise being that in the absence of  
229 artifacts or subpixel clouds, the measured radiance should change smoothly from camera to  
230 camera. The test is achieved by fitting a polynomial to equivalent reflectances, separately for aft  
231 (+nadir) and forward (+nadir) cameras and each spectral band, and checking if the goodness of  
232 fit metric (definition in Diner et al., 2008) exceeds a threshold. If in at least one case the test  
233 fails, the subregion is eliminated.

234 Finally, the angle-to-angle correlation test also investigates radiance smoothness and  
235 correlation between camera angles, which makes it conceptually similar to the angular  
236 smoothness test, but instead utilizes high-resolution information from the red spectral band. It  
237 uses 4 x 4 arrays of the 275m spatial resolution red band equivalent reflectances in each 1.1 km  
238 x 1.1 km subregion. The test then evaluates spatial variability within the 4 x 4 array for each  
239 camera and compares it to a variability within a camera-average template. Variances,  
240 covariances, and normalized cross-correlations are calculated (see Diner et al., (2008) for  
241 details). If the variability within a camera deviates considerably from the average, this camera  
242 might have sub-pixel clouds or other contaminants, and as a result the subregion is excluded  
243 from aerosol retrievals.

244 In the three months of data analyzed in this study (March, April, May 2020), the relative  
245 occurrence of retrieval screening due the above-mentioned internal tests are about 4.0% and  
246 0.1% for the correlation and smoothness tests, respectively. These statistics come from  
247 analyzing the output field *Aerosol\_Retrieval\_Screening\_Flags* and as such they do not  
248 represent the absolute rates of success of each individual test. That is because the tests are  
249 performed in a sequential order and if one of them fails, tests that are next in sequence are not  
250 performed. For *SA* product generation, the order is: upstream cloud mask described in 4.1.1,  
251 the brightness test, the correlation test, and the smoothness test. For example, the correlation

Deleted: standard aerosol



test is only performed on pixels that already passed the upstream cloud tests as well as the brightness test. Additionally, the brightness test does not have its own flag in the *Aerosol\_Retrieval\_Screening\_Flags* output but is grouped together with the upstream cloud classifiers.

## 4.2. Retrieval screening using regional cloud parameters

Methods described in section 4.1 focus on identifying and excluding cloudy 1.1 km x 1.1 km subregions from the aerosol retrieval process. The retrieval region consists of 16 (4 x 4) subregions. These methods are highly effective at removing cloud-contaminated pixels, but since they rely on MISR visible wavelengths they might miss certain cloud signatures more easily detected in the infrared spectrum (e.g., Gao et al., 1993). For example, MODIS routinely uses its reflective and emissive infrared channels to detect optically thin cirrus clouds (Ackerman et al., 2010; Levy et al., 2013). As a result, MISR cloud detection methods occasionally fail, which leads to visible outliers in retrieved AODs (Witek et al., 2018b). For that reason, an additional set of screenings is applied in an effort to eliminate such unusually high AOD retrievals (Garay et al., 2020). Two of these additional methods look at overall cloudiness in the retrieval region (consisting of 4 x 4 subregions) as well as in a larger area consisting of 3 x 3 regions (12 x 12 subregions). The Cloud Screening Parameter (CSP) represents the fraction of clear grid cells within a region, whereas Cloud Screening Parameter Neighbor 3x3 (CSP9) is similar to CSP but for the larger area. If CSP is below 0.7 and CSP9 below 0.5, the retrieval is not reported in the final product intended for most users. However, it is still included in the product's AUXILIARY subcategory and annotated with the term "Raw" to indicate that the product has not undergone recommended quality screenings.

## 4.3. Adjusting cloud screening thresholds

### 4.3.1. Performance of the prototype NRT product

This subsection presents results and analysis of prototype NRT aerosol retrievals. These are obtained prior to any threshold and screening adjustments included in the final version of the product. To differentiate between the final and the prototype NRT products, the latter is denoted as  $NRT_{\text{prot}}$ .

As mentioned in the previous section, the NRT processing cannot rely on the cloud masks generated in the L1 and L2 cloud products, namely the RCCM, SDCM, and ASCM. This implies that potentially less screening of cloudy subregions would be applied, increasing the probability of cloud contamination in aerosol retrievals. However, some of the burden of cloud identification is picked up by the built-in cloud tests described in section 4.1.2. The frequency of these tests identifying cloudy pixels increases in NRT processing in comparison to standard processing, in large part mitigating the negative consequences resulting from the lack of the upstream cloud masks. This is well evidenced by examining the normalized probability density functions (*pdfs*) of AOD from spring 2020 (Figure 2). The *SA* (red) and *NRT<sub>prot</sub>* (blue) lines are very similar, indicating that the built-in cloud tests substitute to a significant extent for the missing upstream cloud masks in generating the *NRT<sub>prot</sub>* product. The largest difference occurs in the high-AOD range, suggesting that *NRT<sub>prot</sub>* has more retrievals in this regime. The black dotted line shows a *pdf* of the *NRT<sub>prot</sub>* AOD retrievals that do not have a matching *SA* retrieval. This is labeled as “*NRT<sub>prot</sub>* gained” as it represents additional retrievals obtained in NRT processing due to the lack of external cloud masks. The “*NRT<sub>prot</sub>* gained” *pdf* is clearly shifted towards higher AODs, confirming that the *NRT<sub>prot</sub>* processing tends to retrieve higher AODs in places where *SA* is not available.

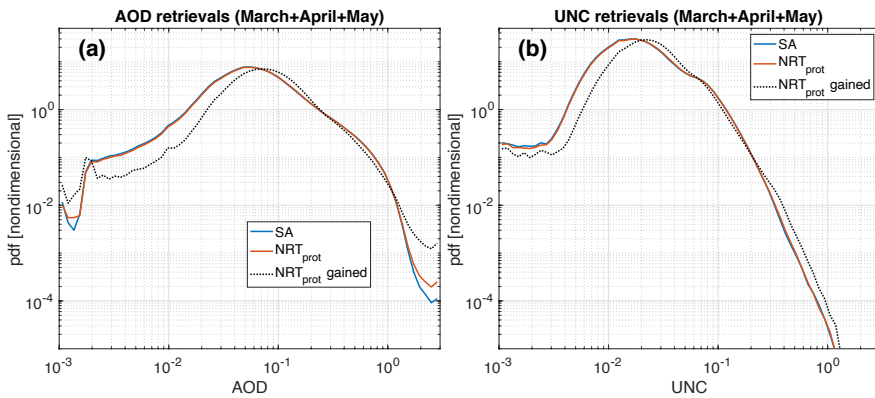

Figure 2 (a) AOD normalized probability density functions from *SA*, prototype NRT, and prototype NRT retrievals that do not have a matching *SA* equivalent (labeled as *NRT<sub>prot</sub>* gained); (b) same as in (a) but for retrieved AOD uncertainties (UNC). Data statistics for AODs are provided in Table 1.

Figure 3 shows *pdfs* of AOD but with retrievals separated between DW (Fig. 3a) and land (Fig. 3b). These *pdfs* indicate that the retrievals over oceans are the main source of

Deleted: FIRSTLOOK

Deleted: FIRSTLOOK

Formatted: Subscript

Deleted: FIRSTLOOK

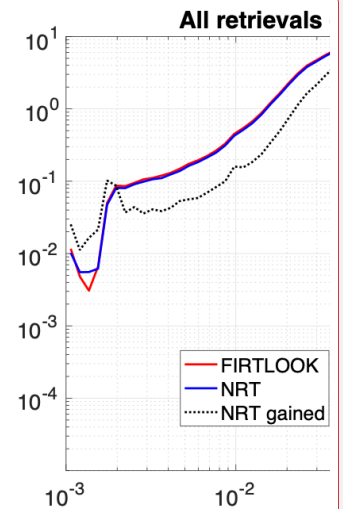

Deleted:

Deleted: FIRSTLOOK

Deleted: FIRSTLOOK

Deleted: .

increased frequency of high-AODs in the  $NRT_{prot}$  product. The  $pdfs$  over land are virtually unchanged, including a slightly flattened but still relatively comparable distribution of the " $NRT_{prot}$  gained" retrievals (Fig. 3b). The additional statistics of the data presented in Figs. 2 and 3, including the retrieval count, the mean AOD, and the geometric mean AOD, which is better suited for log-normal distributions of AOD (Sayer and Knobelspiesse, 2019), are provided in Table 1. Note that the number of  $NRT_{prot}$  gained is not the same as the number of  $NRT_{prot}$  minus SA. This is because some SA retrievals do not have their  $NRT_{prot}$  equivalent, making the SA count larger than it would have been otherwise.

In the 3-month period analyzed in this study (March, April, May, 2020), the  $NRT_{prot}$  processing leads to about 6.4% more retrievals than SA (see Table 1). 5.5 million  $NRT_{prot}$  retrievals do not have a matching SA retrieval (NRT gained), and the majority of them (67%) are DW retrievals. The overall geometric means are almost identical in SA and  $NRT_{prot}$ , although small variations in this statistic are seen in DW and land categories. The NRT gained have visibly higher mean and geometric mean values, the increase coming mainly from DW retrievals. These basic statistics warrant a further look at the  $NRT_{prot}$  performance over DW.

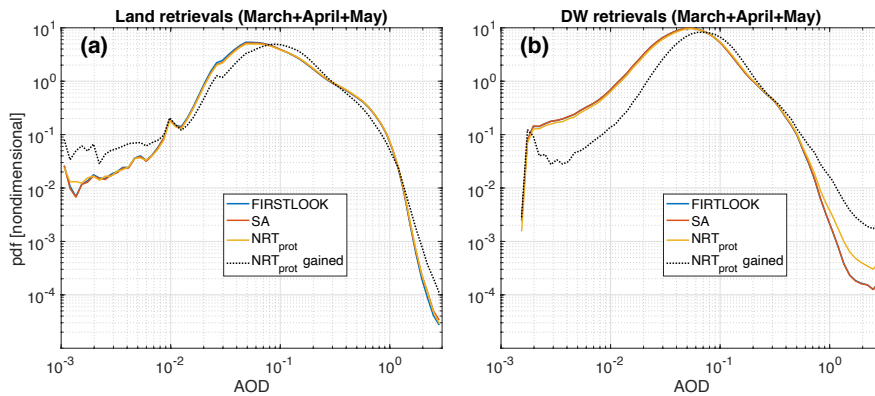

Figure 3 AOD pdfs for land (a) and DW (b) retrievals, respectively. Data statistics are provided in Table 1.

|                   | All retrievals |              |                     | DW   |              |                     | Land |              |
|-------------------|----------------|--------------|---------------------|------|--------------|---------------------|------|--------------|
|                   | SA             | $NRT_{prot}$ | $NRT_{prot}$ gained | SA   | $NRT_{prot}$ | $NRT_{prot}$ gained | SA   | $NRT_{prot}$ |
| $N (\times 10^6)$ | 49.7           | 52.9         | 5.5                 | 27.6 | 30.7         | 3.7                 | 22.1 | 22.2         |

Deleted: similar ...istribution of the " $NRT_{prot}$  gained" retrievals (Fig. 3b). The additional statistics of the data presented in Figs. 2 and 3, including the retrieval count, the mean AOD, and the geometric mean AOD, which is better suited for log-normal distributions of AOD (Sayer and Knobelspiesse, 2019)(Sayer et al. 2020) ... [1]

Formatted: ... [2]

Deleted:

Deleted: 5... more retrievals than SA FIRSTLOOK (see Table 1). 5.54...million  $NRT_{prot}$  retrievals do not have a matching SA/FIRSTLOOK ...retrieval (NRT gained), and the majority of them (678...) are DW retrievals. The overall geometric means are almost identical in SA FIRSTLOOK ... [3]

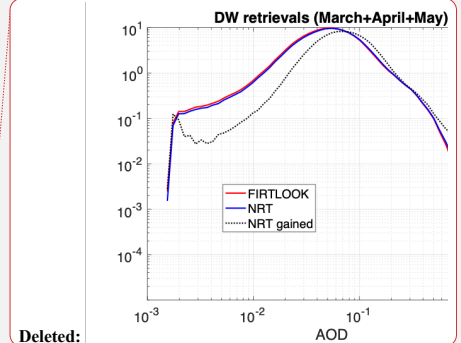

Deleted:

Deleted: Same as in Fig. 2 but with retrievals ...or land (a) and DW (b) retrievals, respectively. separated between DW (a) and land (b). ... [4]

Formatted: Subscript

Formatted: Subscript

Formatted: Subscript

Deleted: FL

Formatted: Subscript

Deleted: FL

Formatted: Subscript

Deleted: FL

Formatted: Subscript

Deleted: 50...7.4 ... [5]

Deleted: 53.7

Deleted: 5.4

Deleted: 27.9

Deleted: 31.1

Deleted: 22.5

Deleted: 22.6

Deleted: 1.7

|         |       |       |       |       |       |       |       |       |                                  |
|---------|-------|-------|-------|-------|-------|-------|-------|-------|----------------------------------|
| mean    | 0.168 | 0.169 | 0.171 | 0.111 | 0.115 | 0.146 | 0.240 | 0.243 | Deleted: 0.167                   |
| geomean | 0.111 | 0.112 | 0.122 | 0.083 | 0.085 | 0.106 | 0.160 | 0.162 | Deleted: 0.167                   |
|         |       |       |       |       |       |       |       |       | Deleted: 0.172                   |
|         |       |       |       |       |       |       |       |       | Deleted: 0.110                   |
|         |       |       |       |       |       |       |       |       | Deleted: 0.237                   |
|         |       |       |       |       |       |       |       |       | Deleted: 0.240                   |
|         |       |       |       |       |       |       |       |       | Deleted: 0.228                   |
|         |       |       |       |       |       |       |       |       | Deleted: 0.110                   |
|         |       |       |       |       |       |       |       |       | Deleted: 0.111                   |
|         |       |       |       |       |       |       |       |       | Deleted: 0.121                   |
|         |       |       |       |       |       |       |       |       | Deleted: 0.082                   |
|         |       |       |       |       |       |       |       |       | Deleted: 0.157                   |
|         |       |       |       |       |       |       |       |       | Deleted: 0.159                   |
|         |       |       |       |       |       |       |       |       | Deleted: FL stand for FIRSTLOOK; |
|         |       |       |       |       |       |       |       |       | Deleted: FIRSTLOOK               |
|         |       |       |       |       |       |       |       |       | Deleted: less                    |
|         |       |       |       |       |       |       |       |       | Deleted: standard                |

Table 1 Additional statistics for the data presented in Figs. 2 and 3 (statistic for FIRSTLOOK not shown). NRT gained stands for the prototype NRT retrievals that do not have a matching SA equivalent; geomean stands for the geometric mean AOD.

#### 4.3.2. Sensitivity to CSP and CSP9 thresholds in DW retrievals

One way to screen potentially cloud-contaminated high-AOD retrievals is to adjust thresholds on CSP and CSP9 parameters (Garay et al., 2020). This is furthermore justified by the fact that in the absence of RCCM, SDCM, and ASCM in NRT<sub>prot</sub> processing, fewer cloudy subregions are identified in a retrieval area and consequently CSP and CSP9 have by default lower values. This argument provides strong justification for investigating sensitivity to increased CSP and CSP9 thresholds in the NRT<sub>prot</sub> processing.

The SA product uses the thresholds of CSP=0.7 and CSP9=0.5 (Garay et al., 2020); when the values of CSP and CSP9 are below these thresholds in a retrieval region, the aerosol retrieval is removed from the data field recommended for users. Figure 4 and Table 2 show pdfs and AOD statistics for different thresholds of CSP and CSP9 parameters in the NRT<sub>prot</sub> product over dark water surfaces. There are only minor changes in the pdfs when the thresholds are increased, including in the high-AOD regime. The mean and geometric mean decrease gradually but slowly; even at the highest considered thresholds (0.85 for CSP and 0.75 for CSP9) these statistics are still above the SA values. At the same time the number of passing NRT<sub>prot</sub> retrievals decreases considerably faster, with almost 19% of retrievals lost when the highest thresholds are used. These results indicate that adjusting CSP and CSP9 thresholds is not an effective strategy to constraining NRT<sub>prot</sub> retrievals.

Deleted: FIRSTLOOK

Deleted: over

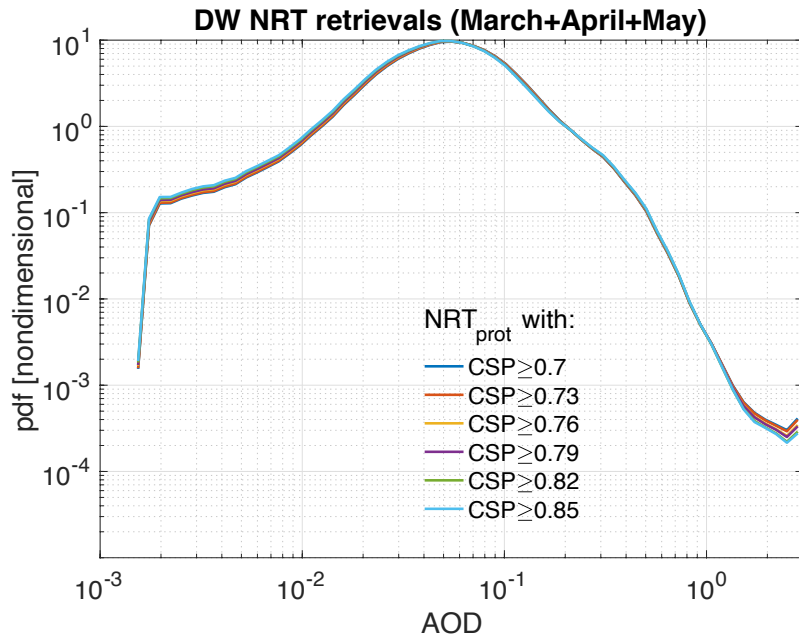

Figure 4 Prototype NRT AOD pdfs over dark water surfaces from spring 2020 obtained with different CSP and CSP9 cloud-screening thresholds. Data statistics are provided in Table 2.

|                        |                     |                     |                     |                     |                     |                     |                     |
|------------------------|---------------------|---------------------|---------------------|---------------------|---------------------|---------------------|---------------------|
| N<br>( $\times 10^6$ ) | 30.7                | 30.1                | 28.4                | 27.7                | 25.9                | 24.9                | SA                  |
|                        |                     | (-1.9%)             | (-7.4%)             | (-9.8%)             | (-15.6%)            | (-18.9%)            | 27.6                |
| CSP                    | $\geq 0.7$          | $\geq 0.73$         | $\geq 0.76$         | $\geq 0.79$         | $\geq 0.82$         | $\geq 0.85$         |                     |
| CSP9                   | $\geq 0.5$          | $\geq 0.55$         | $\geq 0.6$          | $\geq 0.65$         | $\geq 0.7$          | $\geq 0.75$         |                     |
| mean                   | 0.1151 $\pm$ 0.1200 | 0.1149 $\pm$ 0.1199 | 0.1145 $\pm$ 0.1190 | 0.1144 $\pm$ 0.1191 | 0.1142 $\pm$ 0.1185 | 0.1143 $\pm$ 0.1189 | 0.1110 $\pm$ 0.1079 |
| geom<br>ean            | 0.0850              | 0.0847              | 0.0841              | 0.0839              | 0.0834              | 0.0832              | 0.0826              |

Table 2 Additional statistics for the data presented in Fig. 4. Values for CSP and CSP9 indicate their corresponding thresholds for screening AOD retrievals. The arithmetic mean values are accompanied by their respective  $\pm$  one standard deviations.

#### 4.3.3. Sensitivity to ARCI threshold in DW retrievals

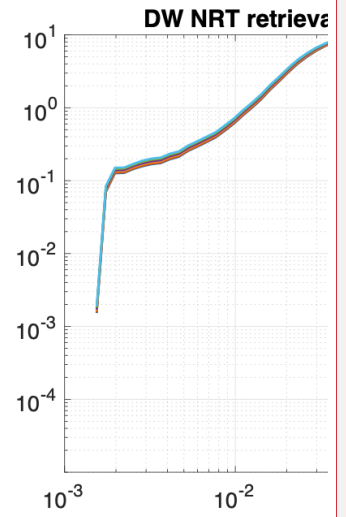

Deleted:

Deleted: 31.1

Deleted: 30.5

Deleted: 28.8

Deleted: 28.1

Deleted: 26.2

Deleted: 25.1

Deleted: FIRSTLOOK

Deleted: 1.7

Deleted: 7.3

Deleted: 9.7

Deleted: 19.2

Deleted: 27.9

Deleted: 0.1147

Deleted: 0.1145

Deleted: 0.1141

Deleted: 0.114

Deleted: 0.1138

Deleted: 0.1139

Deleted: 0.1105

Formatted

... [6]

Deleted: 0.0848

Deleted: 0.0846

Deleted: 0.0840

Deleted: 0.0837

Deleted: 0.0832

Deleted: 0.0830

Deleted: 0.0824

487

488 V23 of the MISR aerosol product introduced a new parameter, called the aerosol retrieval  
489 confidence index (ARCI), that is used to screen high-AOD retrieval outliers caused by cloud  
490 contamination and other factors (Witek et al., 2018b). ARCI, defined only for DW retrievals,  
491 proved to be an efficient metric at filtering out potentially cloud-contaminated AOD retrievals. In  
492 standard processing, retrievals with  $ARCI < 0.15$  are removed from the recommended user  
493 field, but are retained in the AUXILIARY group. The 0.15 threshold is well supported through  
494 statistical analysis (Witek et al., 2018b), although some erroneous AODs still pass this  
495 screening method, suggesting that increasing this threshold might be beneficial in NRT  
496 processing.

497 Figure 5 and Table 3 show *pdfs* and AOD statistics for different thresholds of ARCI in the  
498 NRT<sub>prot</sub> product. In this case the differences between ARCI thresholds are quite noticeable,  
499 especially in the high-AOD range of retrievals. Increasing the ARCI threshold to 0.2 leads to a  
500 loss of about 11% of NRT<sub>prot</sub> DW retrievals, but the resulting mean and geometric mean are  
501 lower than the *SA* values. At the same time, the absolute number of NRT<sub>prot</sub> DW retrievals (27.4  
502 million) is still comparable to the number of *SA* DW retrievals (27.6 million). The *pdfs* and the  
503 statistics suggest that increasing the NRT<sub>prot</sub> ARCI threshold from 0.15 to 0.18 leads to a  
504 product that has similar characteristics to *SA*.

Deleted: FIRSTLOOK

Deleted: 8

Deleted: FIRSTLOOK

Deleted: 9

Deleted: FIRSTLOOK

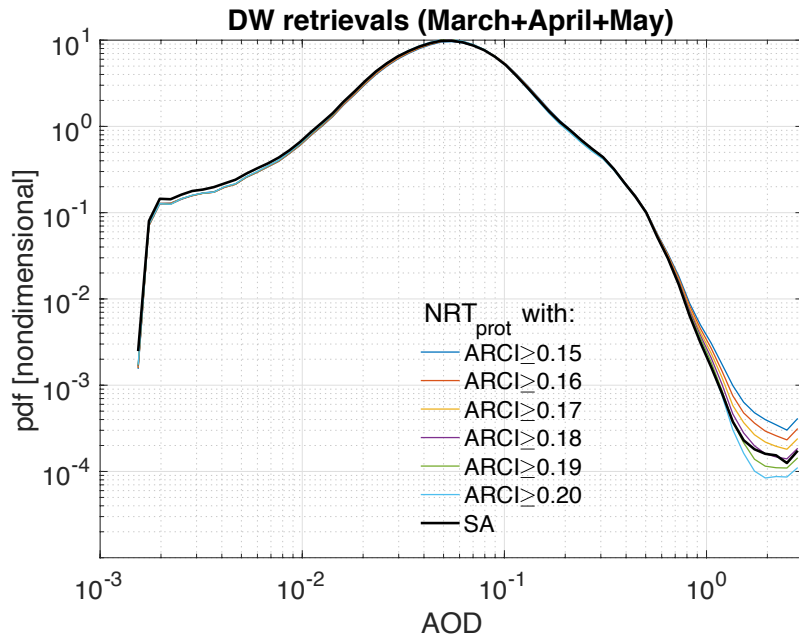

Figure 5 Prototype NRT AOD pdfs from spring 2020 obtained with different ARCI thresholds. Data statistic are provided in Table 3.

| N<br>( $\times 10^6$ ) | <del>30.7</del>                              | <del>30.0</del><br>(-2.2%)                   | <del>29.4</del><br>(-4.3%)                   | <del>28.7</del><br>(-6.5%)                   | <del>28.0</del><br>(-8.6%)                   | <del>27.4</del><br>(-10.8%)                  | SA<br>27.6             |
|------------------------|----------------------------------------------|----------------------------------------------|----------------------------------------------|----------------------------------------------|----------------------------------------------|----------------------------------------------|------------------------|
| ARCI                   | $\geq 0.15$                                  | $\geq 0.16$                                  | $\geq 0.17$                                  | $\geq 0.18$                                  | $\geq 0.19$                                  | $\geq 0.20$                                  |                        |
| mean                   | <del>0.1151 <math>\pm</math></del><br>0.1200 | <del>0.1137 <math>\pm</math></del><br>0.1157 | <del>0.1124 <math>\pm</math></del><br>0.1122 | <del>0.1112 <math>\pm</math></del><br>0.1094 | <del>0.1100 <math>\pm</math></del><br>0.1070 | <del>0.1090 <math>\pm</math></del><br>0.1051 | 0.1110 $\pm$<br>0.1079 |
| geome<br>an            | <del>0.0850</del>                            | <del>0.0842</del>                            | <del>0.0835</del>                            | <del>0.0828</del>                            | <del>0.0821</del>                            | <del>0.0813</del>                            | 0.0826                 |

Table 3 Additional statistic for the data presented in Fig. 5.

#### 4.3.4. Recommendation for NRT processing

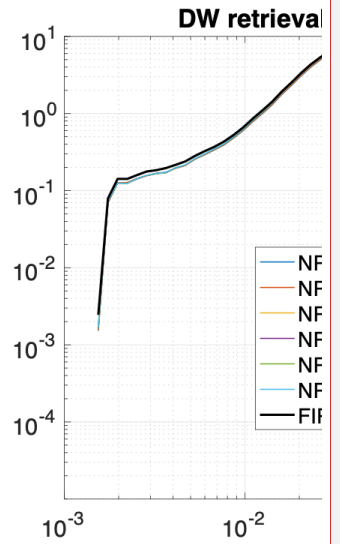

Deleted:

Deleted: 31.1

Deleted: 30.4

Deleted: 29.8

Deleted: 29.1

Deleted: 28.4

Deleted: 27.8

Deleted: Firstlook

Deleted: 8.7

Deleted: 27.9

Deleted: 1147

Deleted: 1133

Deleted: 1120

Deleted: 1108

Deleted: 1096

Deleted: 1086

Deleted: 11...110  $\pm$  0.107905

... [7]

Deleted: 0849

Deleted: 0841

Deleted: 0834

Deleted: 0826

Deleted: 0819

Deleted: 0812

Deleted: 0824

566 The statistical analyses presented in the previous sections indicate that the lack of RCCM,  
567 SDCM, and ASCM in NRT processing has negative consequences on the product, especially by  
568 allowing more, potentially cloud-contaminated, high-AOD DW retrievals to pass screening  
569 criteria. Adjusting build-in cloud screening thresholds on CSP and CSP9 brings only limited  
570 benefits at the cost of losing a considerable percentage of retrievals. However, the ARCI  
571 threshold adjustments result in much closer statistical correspondence between the  $NRT_{prot}$  and  
572 standard AOD retrievals. For that reason, a revised ARCI threshold of 0.18 is implemented in  
573 NRT processing. Since the unscreened retrievals are also provided in the AUXILIARY group of  
574 the product, users are encouraged to experiment with their own thresholds which might prove  
575 more beneficial in specific applications or geographic areas.

Deleted: FIRSTLOOK

#### 577 4.4. Cloud/clear decision logic over snow/ice

578  
579 In section 4.1.1 the impact of upstream cloud classifiers in standard processing—namely the  
580 RCCM, SDCM, and ASCM—on the subregion's cloud/clear designation was briefly described.  
581 The decision pathway depends on the underlying surface type, which can be either land, water,  
582 or snow/ice. Over land and water, the “cloud” outcome is only obtained when both RCCM and  
583 SDCM designate the subregion as cloudy. In the absence of RCCM and SDCM the default  
584 outcome is “clear”. Over snow/ice, however, the logic is more restrictive and favors the “cloudy”  
585 designation (Diner et al., 2008). Specifically, when the upstream cloud classifiers are not  
586 available, the subregion designation is set to “cloudy” by default. This has important implications  
587 on aerosol retrievals in areas where snow and ice occur seasonally.

588 The snow/ice surface mask, unlike land and water, is not static and changes every  
589 month. Furthermore, the snow/ice mask input to MISR aerosol processing has a 1.0-degree  
590 horizontal resolution, which is re-gridded to a 1.1 km resolution corresponding to the resolution  
591 of MISR subregion. In FIRSTLOOK processing, the snow/ice mask from the same month but in  
592 the previous year is used. The final SA processing is performed when the current year's monthly  
593 snow/ice mask becomes available. The NRT processing, similarly to FIRSTLOOK, relies on the  
594 previous year's snow/ice mask. Additionally, given the lack of upstream cloud classifiers, the  
595 snow/ice areas are designated as “cloudy” for aerosol retrieval purposes. This is well visualized  
596 in Figure 6 which shows the visible image and the corresponding maps of AOD and Aerosol  
597 Retrieval Screening Flag in the NRT processing. The dark blue color (index 5) denotes cloudy  
598 regions determined using the snow/ice cloud logic. The box-like nature of the excluded areas is  
599 associated with the coarse resolution of the snow/ice mask (1.0 degree). The previous year's

Deleted: standard

Deleted: FIRSTLOOK retrievals use



mask might also not be representative of the current conditions on the ground. It is worth noting that the FIRSTLOOK product often suffers from the same exclusion rules as NRT. This is because of the strict clear/cloud logic over snow/ice surfaces which favors the cloudy outcome; in the case shown in Fig. 6 the AOD gaps in FIRSTLOOK (not shown) look very similar to the NRT product.

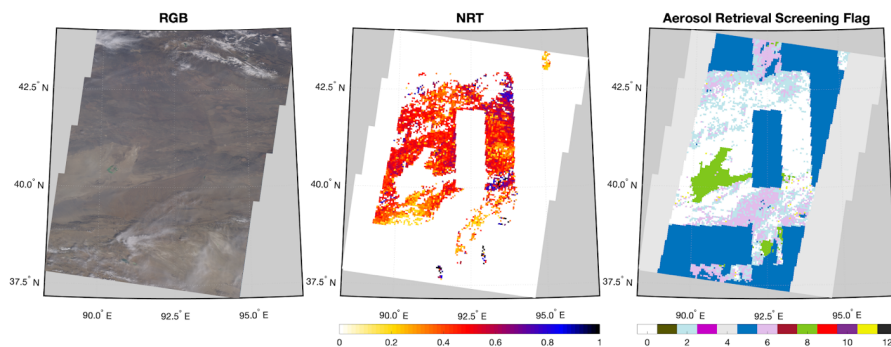

Figure 6 Example of snow/ice masking in NRT AOD retrievals. (Left) Visible image of the retrieval area. (Center) Corresponding NRT AOD retrievals. (Right) NRT Aerosol Retrieval Screening Flag for the same area; the dark blue color denotes regions designated as cloudy.

Several attempts have been made by the MISR science team to improve NRT aerosol retrievals in snow/ice covered areas. However, identifying and isolating snow-covered surfaces in the absence of upstream cloud classifiers proves very challenging. The quality of aerosol retrievals is often negatively affected in such conditions. For that reason, and in an attempt to eliminate as many NRT AOD outliers as possible, the current snow/ice logic is retained in the NRT aerosol processing.

## 5. NRT and SA differences

In this section, geographic distributions of MISR AOD retrievals from SA and NRT products are analyzed. The datasets encompass three months, March, April, and May of 2020. The NRT AOD retrievals are screened with the revised ARCI threshold of 0.18 as suggested in section 4.3.4. The spatial overlap of the SA and NRT data is achieved using an intersect of the X\_Dim and Y\_Dim fields in the two data products.

Deleted: FIRSTLOOK

Deleted: FIRSTLOOK

Deleted: FIRSTLOOK

Figure 7 shows the global distributions of geometric mean AOD from the (a) SA and (b) NRT products. The retrievals are gridded at 2-by-2-degree spatial resolution. Fig. 7c shows the AOD difference between the two products ( $NRT - SA$ ).

The largest AOD differences are seen in areas with climatologically high cloud cover, especially over the Southern Ocean, and over land in areas where potential snow cover could be an issue. Over the Southern Ocean, the SA AODs are predominantly higher than the NRT AODs. This is due to the increased ARCI threshold in NRT (0.18 vs. 0.15 in SA) which brings in more aggressive screening of cloud-contaminated retrievals (Witek et al., 2018b). Over land, where the ARCI parameter is not available, the gridded NRT AODs tend to be higher than the SA AODs, which is in part related to the differences in snow/ice mask between the two products. Still, the AOD differences in Fig. 7c are rather small and reflect sampling issues rather than any systematic deficiencies in NRT processing. At the same time the lack of cloud classifiers in NRT does not adversely affect AOD distributions, which is consistent with the statistical analysis presented in section 4.2.3.

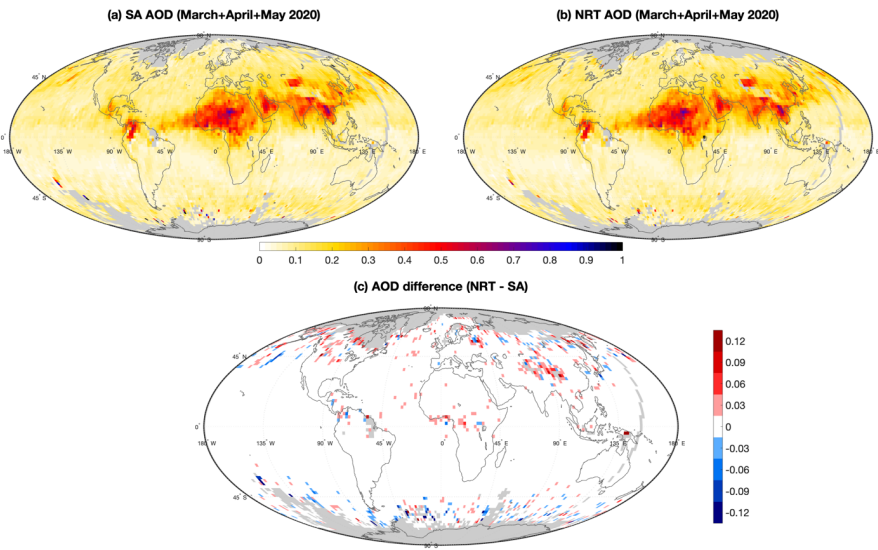

Figure 7 (a) Global distribution of SA AOD geometric mean values across March, April, and May of 2020 on a 2-by-2-degree spatial resolution; (b) same as in (a) but for NRT AOD; and (c) AOD difference between SA and NRT. Grid points with less than 15 retrievals are excluded.

Deleted: FIRSTLOOK

Deleted: In those regions

Deleted: FIRSTLOOK

Deleted: FIRSTLOOK

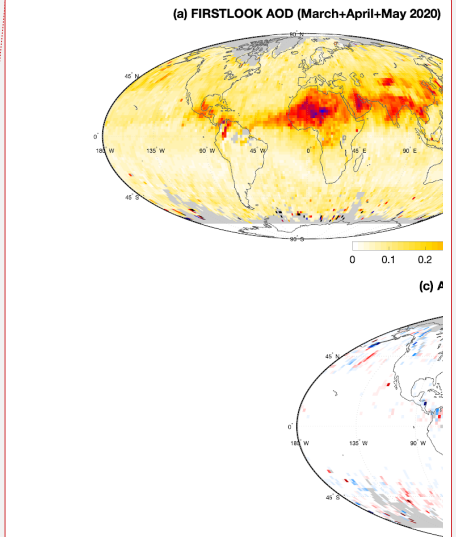

Deleted:

Deleted: FIRSTLOOK

Deleted: FIRSTLOOK

Figure 8 complements Fig. 7 by showing (a) the SA retrieval count distribution as well as (b) the retrieval count difference between the SA and NRT products.

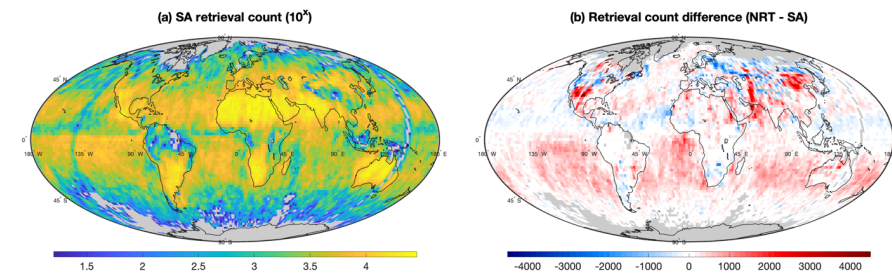

Figure 8 (a) Decimal logarithm of the retrieval count from the SA product in March, April, and May of 2020; (b) retrieval count difference between SA and NRT. Presented values are gridded at 2-by-2-degree spatial resolution and grid points with less than 15 retrievals are excluded.

The highest number of retrievals is found over the subtropical continents where the cloud cover is usually the smallest. Over the subtropical oceans in the Southern Hemisphere the NRT retrieval counts are typically higher than in SA, which results from the absence of upstream cloud classifiers in NRT processing and subsequently fewer subregions being excluded as cloudy. Note that this increase in retrieval count caused by the lack of cloud classifiers is not compensated by the increased ARCI threshold in NRT processing ( $\text{ARCI} \geq 0.18$ ), which always reduces the number of retrievals when compared to the default SA threshold ( $\text{ARCI} \geq 0.15$ ). The lack of hemispheric symmetry in this case is likely due to the seasonal variability (only months in northern spring are analyzed here). Over land the lack of upstream cloud classifiers also results in higher number of NRT retrievals in certain regions, but the surface type exclusion rules reverse this pattern, especially at higher latitudes. The conservative cloud logic over snow/ice surfaces in NRT processing often results in the lower number of NRT retrievals in the high latitudes of the northern hemisphere.

## 6. Summary

The MISR V23 aerosol product, publicly available since mid-2018, is a high-resolution state-of-the-art data product from NASA's Terra flagship mission. V23 AOD retrievals have remarkable accuracy compared against ground-based observations (Garay et al., 2020; Tao et al., 2020; Witek et al., 2019) and the product is more intuitive and easier to use than previous versions.

Deleted: FIRSTLOOK

Deleted: FIRSTLOOK

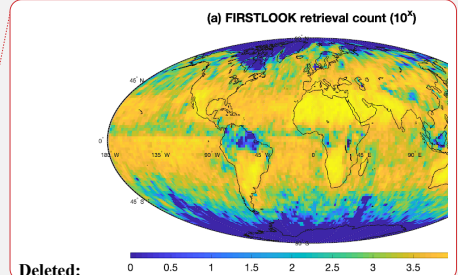

Deleted:

Deleted: FIRSTLOOK

Deleted: FIRSTLOOK

Deleted: lower

Deleted: FIRSTLOOK

Deleted: is attributed to

Deleted: DW retrievals

689 The product is available within 2 days from satellite overpass as a FIRSTLOOK version, and  
690 within 3-to-6 months as a final science-quality [SA](#) version that employs the most up-to-date  
691 ancillary datasets. In response to the needs of operational user communities, a new MISR L2  
692 NRT aerosol product has been developed with a 3-hour latency.

Deleted: "standard"

693 The new NRT algorithm does not depend on the upstream cloud classifiers that are  
694 generated in L1 and L2 cloud processing. The lack of cloud classifiers is in large part mitigated  
695 by the aerosol algorithm's built-in cloud identification methods. Analysis [of the prototype NRT](#)  
696 [product](#) has shown an increased frequency of high-AOD retrievals, especially over oceans and  
697 in climatologically cloudy areas, likely due to an increase in cloud contamination. Adjusting the  
698 ARCI threshold in DW retrievals proves highly effective at eliminating some of these high-AOD  
699 outliers and improves the NRT product's statistical agreement with the [SA](#) version. The new  
700 NRT aerosol product applies an ARCI threshold of 0.18 to mitigate cloud contamination in the  
701 absence of upstream cloud masks in NRT processing. The remaining differences in statistical  
702 and geographic distributions between [the](#) NRT and [SA AODs](#), which includes information from  
703 the L2 cloud product, are small and largely confined to areas with high cloud cover.

Deleted: FIRSTLOOK

Deleted: FIRSTLOOK

704 The results of this study also serve as an example of the effects of screening threshold  
705 adjustments in MISR aerosol retrievals on AOD statistics and distributions. Researchers  
706 interested in particular applications and/or specific geographic regions are encouraged to  
707 experiment with their own threshold to achieve most optimal results. [The NRT aerosol product](#)  
708 [contains both the recommended product contained within the main science directory](#)  
709 ["4.4 KM PRODUCTS" that has the stricter ARCI threshold \(ARCI \$\geq\$ 0.18\), and the unscreened](#)  
710 [product without the additional cloud and ARCI filtering designed for more experienced users,](#)  
711 [located within the AUXILIARY group.](#)

## 713 Acknowledgements

714 This research was carried out at the Jet Propulsion Laboratory, California Institute of  
715 Technology, under a contract with the National Aeronautics and Space Administration. Support  
716 from the MISR project is acknowledged. All data analyzed in this study are publicly available,  
717 although the transient nature of NRT products might limit their availability. The data can be  
718 downloaded from <https://l0dup05.larc.nasa.gov/cgi-bin/MISR/main.cgi>.

Deleted: FIRSTLOOK and

720

725 **References:**

- 726 Ackerman, S., Richard, F., Kathleen, S., Yinghui, L., Liam, G., Bryan, B. and Paul, M.:  
 727 Discriminating clear-sky from cloud with MODIS algorithm theoretical basis document  
 728 (MOD35), Univ. Wisconsin - Madison, 6th Edn.(October), 129 [online] Available from:  
 729 <http://citeseerx.ist.psu.edu/viewdoc/summary?doi=10.1.1.385.4885>, 2010.
- 730 Bocquet, M., Elbern, H., Eskes, H., Hirtl, M., Aabkar, R., Carmichael, G. R., Flemming, J.,  
 731 Inness, A., Pagowski, M., Pérez Camacho, J. L., Saide, P. E., San Jose, R., Sofiev, M., Vira, J.,  
 732 Baklanov, A., Carnevale, C., Grell, G. and Seigneur, C.: Data assimilation in atmospheric  
 733 chemistry models: Current status and future prospects for coupled chemistry meteorology  
 734 models, *Atmos. Chem. Phys.*, 15(10), 5325–5358, doi:10.5194/acp-15-5325-2015, 2015.
- 735 Buchard, V., Da Silva, A. M., Colarco, P. R., Darmenov, A., Randles, C. A., Govindaraju, R.,  
 736 Torres, O., Campbell, J. and Spurr, R.: Using the OMI aerosol index and absorption aerosol  
 737 optical depth to evaluate the NASA MERRA Aerosol Reanalysis, *Atmos. Chem. Phys.*, 15(10),  
 738 5743–5760, doi:10.5194/acp-15-5743-2015, 2015.
- 739 Butz, A., Hasekamp, O. P., Frankenberg, C. and Aben, U.: Retrievals of atmospheric CO<sub>2</sub> from  
 740 simulated space-borne measurements of backscattered near-infrared sunlight: Accounting for  
 741 aerosol effects, *Appl. Opt.*, 48, 3322–3336, doi:10.1364/AO.48.003322, 2009.
- 742 Choi, M., Lim, H., Kim, J., Lee, S., Eck, T. F., Holben, B. N., Garay, M. J., Hyer, E. J., Saide, P.  
 743 E. and Liu, H.: Validation, comparison, and integration of GOCI, AHI, MODIS, MISR, and  
 744 VIIRS aerosol optical depth over East Asia during the 2016 KORUS-AQ campaign, *Atmos.*  
 745 *Meas. Tech.*, 12(8), 4619–4641, doi:10.5194/amt-12-4619-2019, 2019.
- 746 Colarco, P., Da Silva, A., Chin, M. and Diehl, T.: Online simulations of global aerosol  
 747 distributions in the NASA GEOS-4 model and comparisons to satellite and ground-based aerosol  
 748 optical depth, *J. Geophys. Res. Atmos.*, 115(14), doi:10.1029/2009JD012820, 2010.
- 749 Diner, D. J., Beckert, J. C., Reilly, T. H., Bruegge, C. J., Conel, J. E., Kahn, R. A., Martonchik,  
 750 J. V., Ackerman, T. P., Davies, R., Gerstel, S. A. W., Gordon, H. R., Muller, J. P., Myneni, R. B.,  
 751 Sellers, P. J., Pinty, B. and Verstraete, M. M.: Multiangle Image Spectroradiometer (MISR)

752 instrument description and experiment overview, *IEEE Trans. Geosci. Remote Sens.*, 36(4),  
753 1072–1087, 1998.

754 Diner, D. J., Di Girolamo, L. and Clothiaux, E. E.: Level 1 Cloud Detection Algorithm  
755 Theoretical Basis, Jet Propuls. Lab. Calif. Inst. Technol., D-13397(Rev. B), 1999a.

756 Diner, D. J., Davies, R., Di Girolamo, L., Horvath, A., Moroney, C., Muller, J. P., Paradise, S.  
757 R., Wenkert, D. and Zong, J.: Level 2 Cloud Detection and Classification Algorithm Theoretical  
758 Basis, Jet Propuls. Lab. Calif. Inst. Technol., D-11399(Rev. D), 1999b.

759 Diner, D. J., Abdou, W. A., Ackerman, T. P., Crean, K., Gordon, H. R., Kahn, R. A.,  
760 Martonchik, J. V., McMurdock, S., Paradise, S. R. and Pinty, B.: Level 2 aerosol retrieval  
761 algorithm theoretical basis, Jet Propuls. Lab. Calif. Inst. Technol., D-11400(Rev. G), 2008.

762 Frankenberg, C., Hasekamp, O., O'Dell, C., Sanghavi, S., Butz, A. and Worden, J.: Aerosol  
763 information content analysis of multi-angle high spectral resolution measurements and its benefit  
764 for high accuracy greenhouse gas retrievals, *Atmos. Meas. Tech.*, 5(7), 1809–1821,  
765 doi:10.5194/amt-5-1809-2012, 2012.

766 Frouin, R. J., Franz, B. A., Ibrahim, A., Knobelspiesse, K., Ahmad, Z., Cairns, B., Chowdhary,  
767 J., Dierssen, H. M., Tan, J., Dubovik, O., Huang, X., Davis, A. B., Kalashnikova, O., Thompson,  
768 D. R., Remer, L. A., Boss, E., Coddington, O., Deschamps, P. Y., Gao, B. C., Gross, L.,  
769 Hasekamp, O., Omar, A., Pelletier, B., Ramon, D., Steinmetz, F. and Zhai, P. W.: Atmospheric  
770 Correction of Satellite Ocean-Color Imagery During the PACE Era, *Front. Earth Sci.*, 7,  
771 doi:10.3389/feart.2019.00145, 2019.

772 Fu, G., Prata, F., Xiang Lin, H., Heemink, A., Segers, A. and Lu, S.: Data assimilation for  
773 volcanic ash plumes using a satellite observational operator: A case study on the 2010  
774 Eyjafjallajökull volcanic eruption, *Atmos. Chem. Phys.*, 17(2), 1187–1205, doi:10.5194/acp-17-  
775 1187-2017, 2017.

776 Gao, B. C., Goetz, A. F. H. and Wiscombe, W. J.: Cirrus cloud detection from Airborne Imaging  
777 Spectrometer data using the 1.38  $\mu\text{m}$  water vapor band, *Geophys. Res. Lett.*, 20(3), 301–304,  
778 doi:10.1029/93GL00106, 1993.

779 Garay, M. J., Witek, M. L., Kahn, R. A., Seidel, F. C., Limbacher, J. A., Bull, M. A., Diner, D.  
 780 J., Hansen, E. G. E. G., Kalashnikova, O. V., Lee, H., Nastan, A. M. and Yu, Y.: Introducing the  
 781 4.4km spatial resolution Multi-Angle Imaging SpectroRadiometer (MISR) aerosol product,  
 782 *Atmos. Meas. Tech.*, 13(2), 593–628, doi:10.5194/amt-13-593-2020, 2020.

783 Gelaro, R., McCarty, W., Suárez, M. J., Todling, R., Molod, A., Takacs, L., Randles, C. A.,  
 784 Darmenov, A., Bosilovich, M. G., Reichle, R., Wargan, K., Coy, L., Cullather, R., Draper, C.,  
 785 Akella, S., Buchard, V., Conaty, A., da Silva, A. M., Gu, W., Kim, G. K., Koster, R., Lucchesi,  
 786 R., Merkova, D., Nielsen, J. E., Partyka, G., Pawson, S., Putman, W., Rienecker, M., Schubert,  
 787 S. D., Sienkiewicz, M. and Zhao, B.: The modern-era retrospective analysis for research and  
 788 applications, version 2 (MERRA-2), *J. Clim.*, 30(14), 5419–5454, doi:10.1175/JCLI-D-16-  
 789 0758.1, 2017.

790 Girolamo, L. Di and Davies, R.: A Band-Differenced Angular Signature Technique for Cirrus  
 791 Cloud Detection, *IEEE Trans. Geosci. Remote Sens.*, 32(4), 890–896, doi:10.1109/36.298017,  
 792 1994.

793 Girolamo, L. Di and Davies, R.: The Image Navigation Cloud Mask for the Multiangle Imaging  
 794 Spectroradiometer (MISR), *J. Atmos. Ocean. Technol.*, 12(6), doi:10.1175/1520-  
 795 0426(1995)012<1215:tincmf>2.0.co;2, 1995.

796 Gordon, R.: Atmospheric correction of ocean color imagery in the Earth Observing System era,  
 797 *J. Geophys. Res. - Atmos.*, 102(D14), 17081–17106, doi:10.1029/96JD02443, 1997.

798 Houweling, S., Hartmann, W., Aben, I., Schrijver, H., Skidmore, J., Roelofs, G. J. and Breon, F.  
 799 M.: Evidence of systematic errors in SCIAMACHY-observed CO<sub>2</sub> due to aerosols, *Atmos.*  
 800 *Chem. Phys.*, 5(11), 3003–3013, doi:10.5194/acp-5-3003-2005, 2005.

801 Inness, A., Baier, F., Benedetti, A., Bouarar, I., Chabrillat, S., Clark, H., Clerbaux, C., Coheur,  
 802 P., Engelen, R. J., Errera, Q., Flemming, J., George, M., Granier, C., Hadji-Lazaro, J., Huijnen,  
 803 V., Hurtmans, D., Jones, L., Kaiser, J. W., Kapsomenakis, J., Lefever, K., Leitão, J., Razinger,  
 804 M., Richter, A., Schultz, M. G., Simmons, A. J., Suttie, M., Stein, O., Thépaut, J. N., Thouret,  
 805 V., Vrekoussis, M. and Zerefos, C.: The MACC reanalysis: An 8 yr data set of atmospheric  
 806 composition, *Atmos. Chem. Phys.*, 13(8), 4073–4109, doi:10.5194/acp-13-4073-2013, 2013.

807 Inness, A., Ades, M., Agustí-Panareda, A., Barré, J., Benedictow, A., Blechschmidt, A.-M.,  
 808 Dominguez, J. J., Engelen, R., Eskes, H., Flemming, J., Huijnen, V., Jones, L., Kipling, Z.,  
 809 Massart, S., Parrington, M., Peuch, V.-H., Razinger, M., Remy, S., Schulz, M. and Suttie, M.:  
 810 The CAMS reanalysis of atmospheric composition, *Atmos. Chem. Phys.*, 19(6), 3515–3556,  
 811 doi:10.5194/acp-19-3515-2019, 2019.

812 IPCC: Climate Change 2013: The Physical Science Basis. Contribution of Working Group I to  
 813 the Fifth Assessment Report of the Intergovernmental Panel on Climate Change, edited by T. F.  
 814 Stocker, D. Qin, G. K. Plattner, M. M. B. Tignor, S. K. Allen, J. Boschung, A. Nauels, Y. Xia,  
 815 V. Bex, and P. M. Midgley, Cambridge University Press, Cambridge, United Kingdom and New  
 816 York, NY, USA., 2013.

817 Kahn, R. A. and Gaitley, B. J.: An analysis of global aerosol type as retrieved by MISR, *J.*  
 818 *Geophys. Res. Atmos.*, 120(9), 4248–4281, doi:10.1002/2015JD023322, 2015.

819 Kahn, R. A., Gaitley, B. J., Garay, M. J., Diner, D. J., Eck, T. F., Smirnov, A. and Holben, B. N.:  
 820 Multiangle Imaging SpectroRadiometer global aerosol product assessment by comparison with  
 821 the Aerosol Robotic Network, *J. Geophys. Res. Atmos.*, 115(23), doi:10.1029/2010JD014601,  
 822 2010.

823 Kalashnikova, O. V., Garay, M. J., Martonchik, J. V. and Diner, D. J.: MISR Dark Water aerosol  
 824 retrievals: Operational algorithm sensitivity to particle non-sphericity, *Atmos. Meas. Tech.*, 6(8),  
 825 2131–2154, doi:10.5194/amt-6-2131-2013, 2013.

826 Lamarque, J. F., Shindell, D. T., Josse, B., Young, P. J., Cionni, I., Eyring, V., Bergmann, D.,  
 827 Cameron-Smith, P., Collins, W. J., Doherty, R., Dalsoren, S., Faluvegi, G., Folberth, G., Ghan,  
 828 S. J., Horowitz, L. W., Lee, Y. H., MacKenzie, I. A., Nagashima, T., Naik, V., Plummer, D.,  
 829 Righi, M., Rumbold, S. T., Schulz, M., Skeie, R. B., Stevenson, D. S., Strode, S., Sudo, K.,  
 830 Szopa, S., Voulgarakis, A. and Zeng, G.: The atmospheric chemistry and climate model  
 831 intercomparison Project (ACCMIP): Overview and description of models, simulations and  
 832 climate diagnostics, *Geosci. Model Dev.*, 6(1), 179–206, doi:10.5194/gmd-6-179-2013, 2013.

833 Lelieveld, J., Evans, J. S., Fnais, M., Giannadaki, D. and Pozzer, A.: The contribution of outdoor  
 834 air pollution sources to premature mortality on a global scale, *Nature*, 525(7569), 367–371,



835 doi:10.1038/nature15371, 2015.

836 Levy, R. C., Mattoo, S., Munchak, L. A., Remer, L. A., Sayer, A. M., Patadia, F. and Hsu, N. C.:  
837 The Collection 6 MODIS aerosol products over land and ocean, *Atmos. Meas. Tech.*, 6(11),  
838 2989–3034, doi:10.5194/amt-6-2989-2013, 2013.

839 Liu, M., Westphal, D. L., Walker, A. L., Holt, T. R., Richardson, K. A. and Miller, S. D.:  
840 COAMPS real-time dust storm forecasting during operation Iraqi freedom, *Weather Forecast.*,  
841 22(1), 192–206, doi:10.1175/WAF971.1, 2007.

842 Lynch, P., Reid, J. S., Westphal, D. L., Zhang, J., Hogan, T. F., Hyer, E. J., Curtis, C. A., Hegg,  
843 D. A., Shi, Y., Campbell, J. R., Rubin, J. I., Sessions, W. R., Turk, F. J. and Walker, A. L.: An  
844 11-year global gridded aerosol optical thickness reanalysis (v1.0) for atmospheric and climate  
845 sciences, *Geosci. Model Dev.*, 9(4), 1489–1522, doi:10.5194/gmd-9-1489-2016, 2016.

846 Martonchik, J. V., Kahn, R. A. and Diner, D. J.: Retrieval of aerosol properties over land using  
847 MISR observations, in *Satellite Aerosol Remote Sensing over Land*, pp. 267–293, Springer  
848 Berlin Heidelberg, 2009.

849 Rienecker, M. M., Suarez, M. J., Gelaro, R., Todling, R., Bacmeister, J., Liu, E., Bosilovich, M.  
850 G., Schubert, S. D., Takacs, L., Kim, G. K., Bloom, S., Chen, J., Collins, D., Conaty, A., Da  
851 Silva, A., Gu, W., Joiner, J., Koster, R. D., Lucchesi, R., Molod, A., Owens, T., Pawson, S.,  
852 Pegion, P., Redder, C. R., Reichle, R., Robertson, F. R., Ruddick, A. G., Sienkiewicz, M. and  
853 Woollen, J.: MERRA: NASA’s modern-era retrospective analysis for research and applications,  
854 *J. Clim.*, 24, 3624–3648, doi:10.1175/JCLI-D-11-00015.1, 2011.

855 Sayer, A. M. and Knobelspiesse, K. D.: How should we aggregate data? Methods accounting for  
856 the numerical distributions, with an assessment of aerosol optical depth, *Atmos. Chem. Phys.*,  
857 19(23), 15023–15048, doi:10.5194/acp-19-15023-2019, 2019.

858 Sayer, A. M., Govaerts, Y., Kolmonen, P., Lipponen, A., Luffarelli, M., Mielonen, T., Patadia,  
859 F., Popp, T., Povey, A. C., Stebel, K. and Witek, M. L.: A review and framework for the  
860 evaluation of pixel-level uncertainty estimates in satellite aerosol remote sensing, *Atmos. Meas.*  
861 *Tech.*, 13(2), 373–404, doi:10.5194/amt-13-373-2020, 2020.

862 Sekiyama, T. T., Tanaka, T. Y., Shimizu, A. and Miyoshi, T.: Data assimilation of CALIPSO  
863 aerosol observations, *Atmos. Chem. Phys.*, 10(1), 39–49, doi:10.5194/acp-10-39-2010, 2010.

864 Shi, Y., Zhang, J., Reid, J. S., Holben, B., Hyer, E. J. and Curtis, C.: An analysis of the collection  
865 5 MODIS over-ocean aerosol optical depth product for its implication in aerosol assimilation,  
866 *Atmos. Chem. Phys.*, 11(2), 557–565, doi:10.5194/acp-11-557-2011, 2011.

867 Shi, Y., Zhang, J., Reid, J. S., Hyer, E. J. and Hsu, N. C.: Critical evaluation of the MODIS Deep  
868 Blue aerosol optical depth product for data assimilation over North Africa, *Atmos. Meas. Tech.*,  
869 6(4), 949–969, doi:10.5194/amt-6-949-2013, 2013.

870 Shi, Y., Zhang, J., Reid, J. S., Liu, B. and Hyer, E. J.: Critical evaluation of cloud contamination  
871 in the MISR aerosol products using MODIS cloud mask products, *Atmos. Meas. Tech.*, 7(6),  
872 1791–1801, doi:10.5194/amt-7-1791-2014, 2014.

873 Shindell, D. T., Lamarque, J. F., Schulz, M., Flanner, M., Jiao, C., Chin, M., Young, P. J., Lee,  
874 Y. H., Rotstayn, L., Mahowald, N., Milly, G., Faluvegi, G., Balkanski, Y., Collins, W. J.,  
875 Conley, A. J., Dalsoren, S., Easter, R., Ghan, S., Horowitz, L., Liu, X., Myhre, G., Nagashima,  
876 T., Naik, V., Rumbold, S. T., Skeie, R., Sudo, K., Szopa, S., Takemura, T., Voulgarakis, A.,  
877 Yoon, J. H. and Lo, F.: Radiative forcing in the ACCMIP historical and future climate  
878 simulations, *Atmos. Chem. Phys.*, 13(6), 2939–2974, doi:10.5194/acp-13-2939-2013, 2013.

879 Si, Y., Chen, L., Xiong, X., Shi, S., Husi, L. and Cai, K.: Evaluation of the MISR fine resolution  
880 aerosol product using MODIS, MISR, and ground observations over China, *Atmos. Environ.*,  
881 223(December 2019), 117229, doi:10.1016/j.atmosenv.2019.117229, 2020.

882 Sogacheva, L., Popp, T., Sayer, A. M., Dubovik, O., Garay, M. J., Heckel, A., Hsu, N. C.,  
883 Jethva, H., Kahn, R. A., Kolmonen, P., Kosmale, M., de Leeuw, G., Levy, R. C., Litvinov, P.,  
884 Lyapustin, A., North, P., Torres, O. and Arola, A.: Merging regional and global aerosol optical  
885 depth records from major available satellite products, *Atmos. Chem. Phys.*, 20(4), 2031–2056,  
886 doi:10.5194/acp-20-2031-2020, 2020.

887 Tao, M., Wang, J., Li, R., Chen, L., Xu, X., Wang, L., Tao, J., Wang, Z. and Xiang, J.:  
888 Characterization of Aerosol Type Over East Asia by 4.4 km MISR Product: First Insight and

889 General Performance, *J. Geophys. Res. Atmos.*, 125(13), 1–16, doi:10.1029/2019JD031909,  
890 2020.

891 Di Tomaso, E., Schutgens, N. A. J., Jorba, O. and García-Pando, C. P.: Assimilation of MODIS  
892 Dark Target and Deep Blue observations in the dust aerosol component of NMMB-MONARCH  
893 version 1.0, *Geosci. Model Dev.*, 10(3), 1107–1129, doi:10.5194/gmd-10-1107-2017, 2017.

894 Turnock, S. T., Allen, R. J., Andrews, M., Bauer, S. E., Deushi, M., Emmons, L., Good, P.,  
895 Horowitz, L., John, J. G., Michou, M., Nabat, P., Naik, V., Neubauer, D., O’Connor, F. M.,  
896 Olivie, D., Oshima, N., Schulz, M., Sellar, A., Shim, S., Takemura, T., Tilmes, S., Tsigaridis, K.,  
897 Wu, T. and Zhang, J.: Historical and future changes in air pollutants from CMIP6 models,  
898 *Atmos. Chem. Phys.*, 20(23), 14547–14579, doi:10.5194/acp-20-14547-2020, 2020.

899 Werner, M., Kryza, M. and Guzikowski, J.: Can data assimilation of surface PM2.5 and Satellite  
900 AOD improve WRF-Chem Forecasting? A case study for two scenarios of particulate air  
901 pollution episodes in Poland, *Remote Sens.*, 11(20), doi:10.3390/rs11202364, 2019.

902 Witek, M. L., Garay, M. J., Diner, D. J. and Smirnov, A.: Aerosol optical depths over oceans: A  
903 view from MISR retrievals and collocated MAN and AERONET in situ observations, *J.*  
904 *Geophys. Res. Atmos.*, 118(22), 12620–12633, doi:10.1002/2013JD020393, 2013.

905 Witek, M. L., Diner, D. J., Garay, M. J., Xu, F., Bull, M. A. and Seidel, F. C.: Improving MISR  
906 AOD Retrievals with Low-Light-Level Corrections for Veiling Light, *IEEE Trans. Geosci.*  
907 *Remote Sens.*, 56(3), 1251–1268, doi:10.1109/TGRS.2017.2727342, 2018a.

908 Witek, M. L., Garay, M. J., Diner, D. J., Bull, M. A. and Seidel, F. C.: New approach to the  
909 retrieval of AOD and its uncertainty from MISR observations over dark water, *Atmos. Meas.*  
910 *Tech.*, 11(1), 429–439, doi:10.5194/amt-11-429-2018, 2018b.

911 Witek, M. L., Garay, M. J., Diner, D. J. and Smirnov, A.: Oceanic Aerosol Loading Derived  
912 From MISR’s 4.4 km (V23) Aerosol Product, *J. Geophys. Res. Atmos.*, 124(17–18), 10154–  
913 10174, doi:10.1029/2019JD031065, 2019.

914 Xian, P., Reid, J. S., Hyer, E. J., Sampson, C. R., Rubin, J. I., Ades, M., Asencio, N., Basart, S.,  
915 Benedetti, A., Bhattacharjee, P. S., Brooks, M. E., Colarco, P. R., da Silva, A. M., Eck, T. F.,

916 Guth, J., Jorba, O., Kouznetsov, R., Kipling, Z., Sofiev, M., Perez Garcia-Pando, C., Pradhan,  
917 Y., Tanaka, T., Wang, J., Westphal, D. L., Yumimoto, K. and Zhang, J.: Current state of the  
918 global operational aerosol multi-model ensemble: An update from the International Cooperative  
919 for Aerosol Prediction (ICAP), *Q. J. R. Meteorol. Soc.*, 145, 176–209, doi:10.1002/qj.3497,  
920 2019.

921 Zhang, J. and Reid, J. S.: An analysis of clear sky and contextual biases using an operational  
922 over ocean MODIS aerosol product, *Geophys. Res. Lett.*, 36(15), doi:10.1029/2009GL038723,  
923 2009.

924 Zhang, J. and Reid, J. S.: A decadal regional and global trend analysis of the aerosol optical  
925 depth using a data-assimilation grade over-water MODIS and Level 2 MISR aerosol products,  
926 *Atmos. Chem. Phys.*, 10(22), 10949–10963, doi:10.5194/acp-10-10949-2010, 2010.

927 Zhang, J., Reid, J. S., Westphal, D. L., Baker, N. L. and Hyer, E. J.: A system for operational  
928 aerosol optical depth data assimilation over global oceans, *J. Geophys. Res. Atmos.*, 113(10), 1–  
929 13, doi:10.1029/2007JD009065, 2008.

930

Page 11: [1] Deleted      Microsoft Office User      4/22/21 4:25:00 PM

Page 11: [1] Deleted      Microsoft Office User      4/22/21 4:25:00 PM

Page 11: [2] Formatted      Microsoft Office User      4/19/21 4:51:00 PM

Subscript

Page 11: [2] Formatted      Microsoft Office User      4/19/21 4:51:00 PM

Subscript

Page 11: [2] Formatted      Microsoft Office User      4/19/21 4:51:00 PM

Subscript

Page 11: [3] Deleted      Microsoft Office User      4/19/21 4:00:00 PM

Page 11: [3] Deleted      Microsoft Office User      4/19/21 4:00:00 PM

Page 11: [3] Deleted      Microsoft Office User      4/19/21 4:00:00 PM

Page 11: [3] Deleted      Microsoft Office User      4/19/21 4:00:00 PM

Page 11: [3] Deleted      Microsoft Office User      4/19/21 4:00:00 PM

Page 11: [3] Deleted      Microsoft Office User      4/19/21 4:00:00 PM

Page 11: [4] Deleted      Microsoft Office User      4/22/21 3:30:00 PM

Page 11: [4] Deleted      Microsoft Office User      4/22/21 3:30:00 PM

Page 11: [5] Deleted      Microsoft Office User      4/19/21 12:18:00 PM

Page 11: [5] Deleted      Microsoft Office User      4/19/21 12:18:00 PM

|                        |                       |                     |
|------------------------|-----------------------|---------------------|
| Page 13: [6] Formatted | Microsoft Office User | 4/22/21 10:13:00 AM |
|------------------------|-----------------------|---------------------|

Font: 9 pt

|                        |                       |                     |
|------------------------|-----------------------|---------------------|
| Page 13: [6] Formatted | Microsoft Office User | 4/22/21 10:13:00 AM |
|------------------------|-----------------------|---------------------|

Font: 9 pt

|                      |                       |                     |
|----------------------|-----------------------|---------------------|
| Page 15: [7] Deleted | Microsoft Office User | 4/19/21 12:42:00 PM |
|----------------------|-----------------------|---------------------|

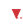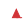

|                      |                       |                     |
|----------------------|-----------------------|---------------------|
| Page 15: [7] Deleted | Microsoft Office User | 4/19/21 12:42:00 PM |
|----------------------|-----------------------|---------------------|

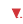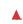

Supplement: Supplementary file [file amt-2021-71-AC5-supplement.pdf]
